# Supplementary material for: Inhibitory Action of Antidepressants on Mouse Betaine/GABA Transporter (BGT1) Heterologously Expressed in Cell Cultures
Source: Int J Mol Sci. 2012 Feb 24;13(3):2578–89. doi: 10.3390/ijms13032578 (PMC3317675; doi:10.3390/ijms13032578)

## Supplementary Information

**Supplementary Table S1.** Classification of the GABA transporters.

|                                     |       | <b>BGT1</b>           | <b>GAT1</b>                                       | <b>GAT2</b>        | <b>GAT3</b>              |
|-------------------------------------|-------|-----------------------|---------------------------------------------------|--------------------|--------------------------|
| <b>alternate</b>                    | Human | hBGT1                 | hGAT1                                             | hGAT2              | hGAT3                    |
|                                     | Mouse | mGAT2                 | mGAT1                                             | mGAT4              | mGAT3                    |
|                                     | Rat   |                       | rGAT-A                                            |                    | rGAT-B                   |
| <b>gene ID</b>                      |       | SLC6A12               | SLC6A1                                            | SLC6A13            | SLC6A11                  |
| <b>Accession number<sup>#</sup></b> |       | BC019211              | BC059080                                          | AK149557           | AK140423                 |
| <b>Substrates</b>                   |       | GABA, Betaine         | GABA,<br>Nipecotate                               | GABA,<br>β-Alanine | GABA,<br>β-Alanine       |
| <b>Inhibitors</b>                   |       | NNC05-2090,<br>EF1502 | Tiagabine,<br>SKF89976A,<br>EF1502,<br>NNC05-2090 | SNAP-5114          | SNAP-5114,<br>NNC05-2090 |

<sup>#</sup>Accession number for cDNA used in the present study.

**Supplementary Table S2.** IC<sub>50</sub> (μM) of the GABA uptake inhibitors (substrates) in inhibiting [<sup>3</sup>H]GABA uptake by CHO cells stably expressing mouse GABA transporter subtypes. Cells in 48-well culture plate were incubated with 10 nM [<sup>3</sup>H]GABA for 10 min in the presence or absence of inhibitors. Uptake of [<sup>3</sup>H]GABA was determined in duplicate or triplicate from single experiment, and IC<sub>50</sub> was calculated using Prism5. Specific uptake of [<sup>3</sup>H]GABA by mGAT1, mGAT2, mGAT3 and mBGT1 in the absence of inhibitors was 8992.5, 2776.5, 2594.3 and 273.0 dpm/well, respectively.

| <b>Inhibitors</b> | <b>mGAT1</b> | <b>mGAT2</b> | <b>mGAT3</b> | <b>mBGT1</b> |
|-------------------|--------------|--------------|--------------|--------------|
| GABA              | 6.4          | 13           | 4.6          | 115          |
| Nipecotic acid    | 9.7          | 113          | 86           | 7098         |
| β-Alanine         | >300         | 25           | 18           | >1000        |
| Betaine           | >10000       | >10000       | >10000       | 693          |

**Supplementary Figure S1.** Inhibition of the GABA and serotonin transporters by antidepressants. Effects of amitriptyline (A), maprotiline (B), mianserine (C) and trimipramine (D) on uptake of [ $^3$ H]GABA and [ $^3$ H]5-HT was examined in the CHO cells stably expressing mouse GAT subtypes and rat SERT. Uptake assays were performed in 48-well plates for mGATs and 24-well plates for rSERT. Each panel shows a typical result from single experiment performed in duplicate or triplicate, and data were expressed as % of control (uptake in the absence of drugs tested). Control uptake by mGAT1, mGAT2, mGAT3, mBGT1 and rSERT was 7395.4, 2933.7, 15845.9, 466.7 and 12655.4 dpm/well, respectively.

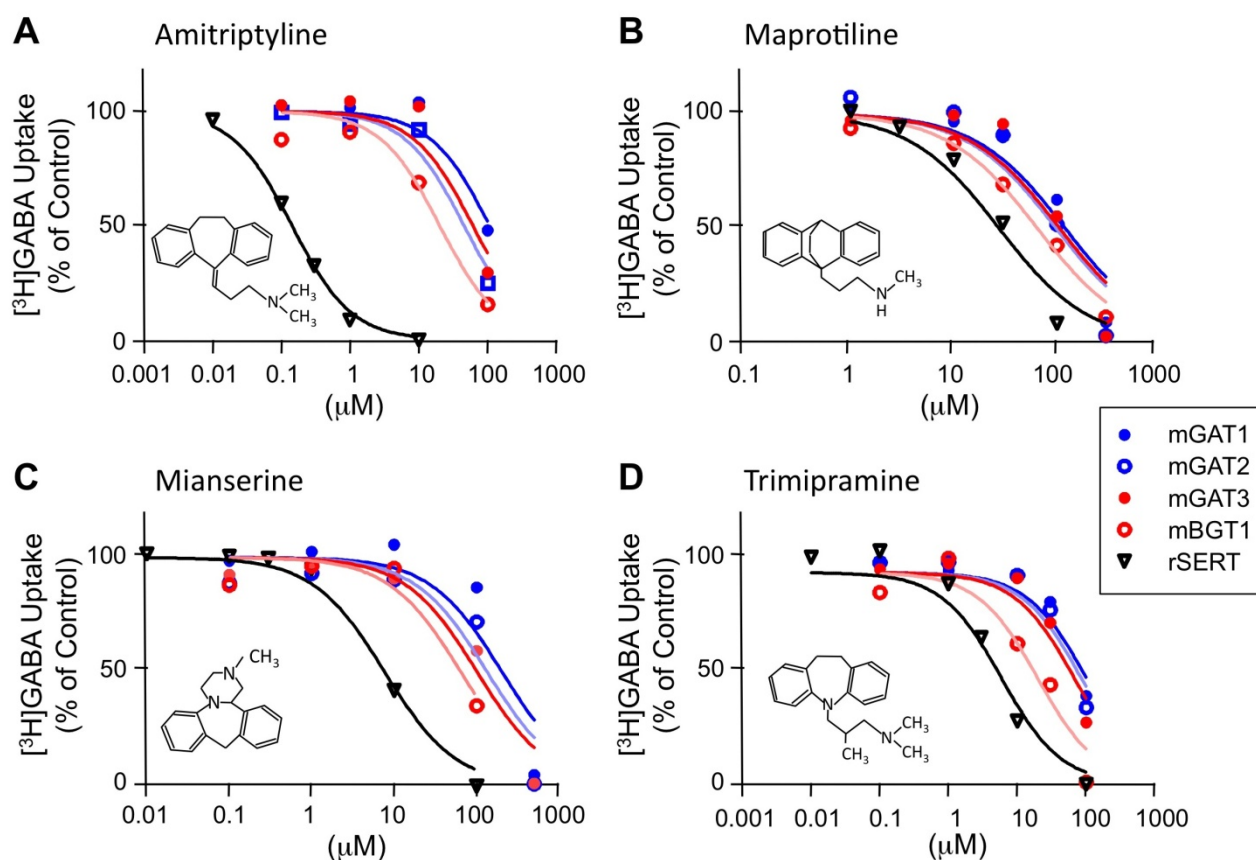

**Supplementary Figure S2.** Correlation analyses of the potency of antidepressants in inhibiting the GABA and serotonin transporters.  $IC_{50}$  values ( $\mu M$ ) of the inhibitory potencies of 11 antidepressants including maprotiline (circled and numbered 1), mianserine (circled and numbered 2) and trimipramine (circled and numbered 3) were analyzed for rSERT vs. mGAT1 (A), rSERT vs. mGAT2 (B), rSERT vs. mGAT3 (C), rSERT vs. mBGT1 (D), and mGAT1 vs. mBGT1 (E). Values in each panel represent Pearson's correlation coefficient ( $r$ ) and calculated  $P$ .  $r$  and  $P$  in panels A~D represent those calculated by excluding maprotiline, mianserine and trimipramine. When values for those antidepressants were included,  $r$  decreased and no significance was observed ( $P > 0.05$ ). Correlation between GAT subtypes was significant even if values for those antidepressants were included. Values in E represent  $r$  and  $P$  when calculated by including maprotiline, mianserine and trimipramine.

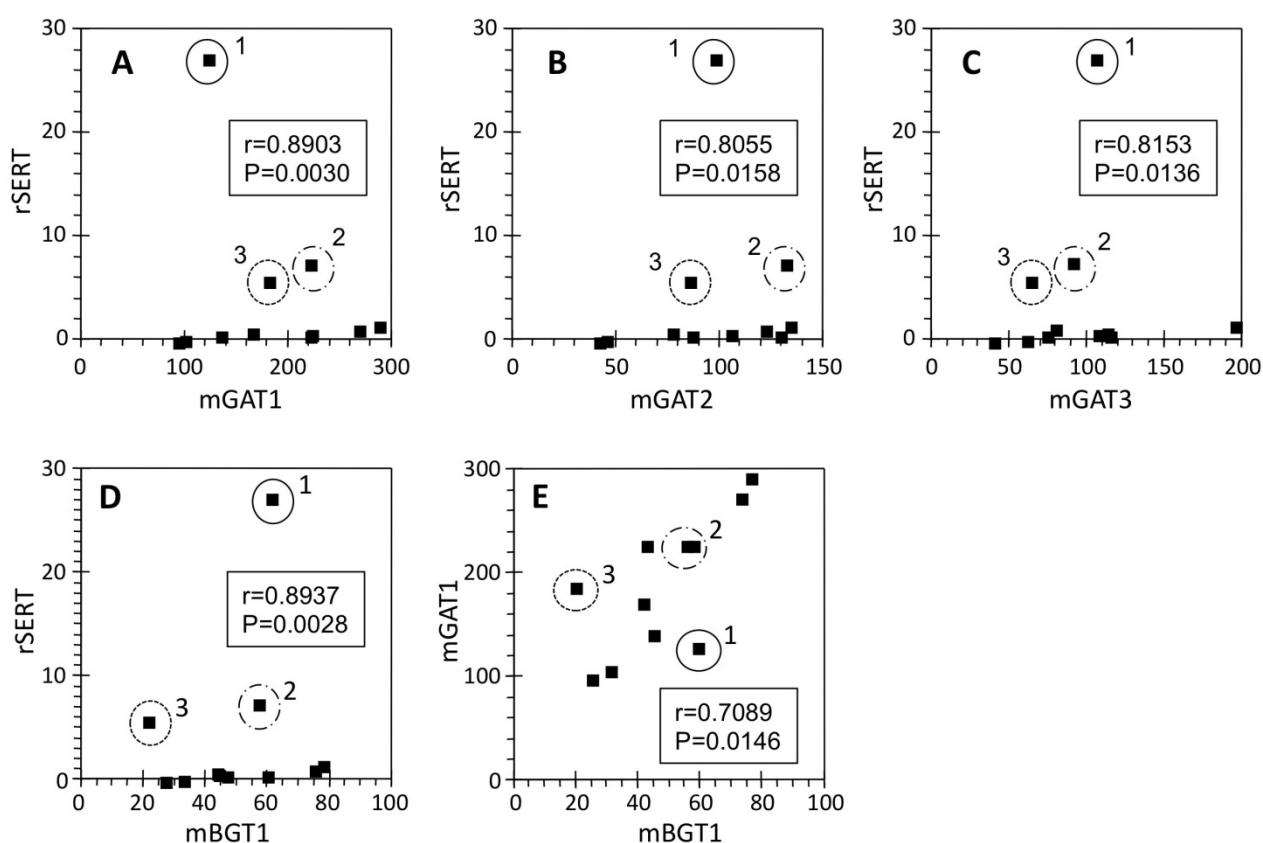

**Supplementary Figure S3.** Comparison of the amino acid sequences between mGATs, rat SERT and LeuT at the regions predicted for antidepressant- and substrate-binding site. Candidate amino acids for extracellular vestibule (EV) tricyclic antidepressant (TCA)-binding site, central substrate-binding site (S1) and second substrate-binding site (S2) between mGAT1, mGAT2, mGAT3, mBGT1 and rSERT are aligned with those of LeuT, a bacterial homolog of Na<sup>+</sup>- and Cl<sup>-</sup>-dependent neurotransmitter transporter. Amino acid residues of mBGT1 different from mGAT1 were indicated in bold letter and highlighted.

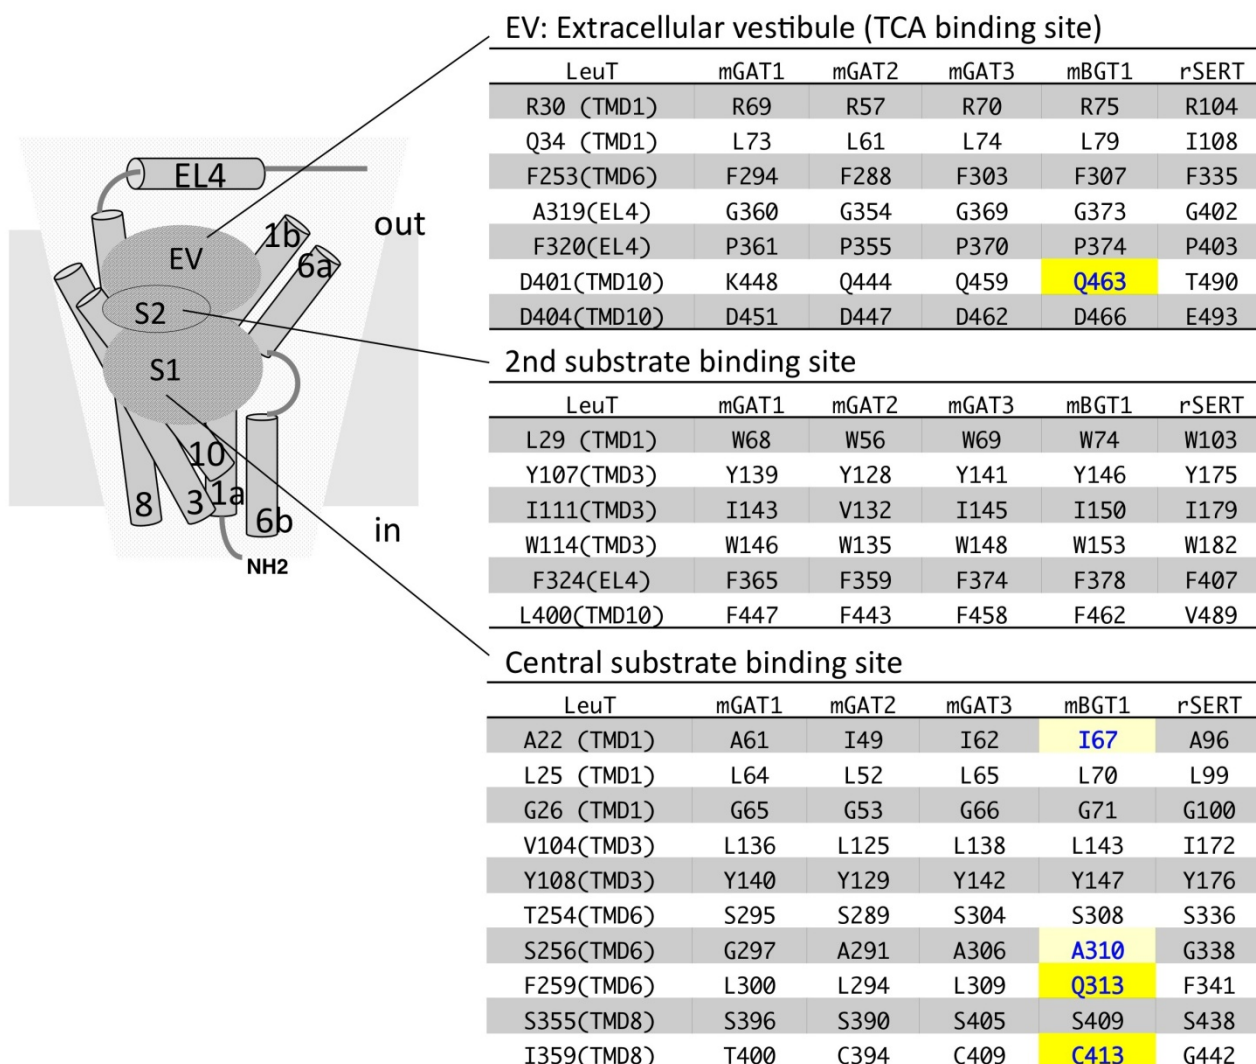

Supplement: Supplementary file 1 [file ijms-13-02578-s001.pdf]
